# Supplementary material for: An NMR and relativistic DFT investigation of one-bond nuclear spin–spin coupling in solid triphenyl group-14 chlorides
Source: Royal Society of Chemistry journal article supplement (doi:10.1039/b603937e), 2006-01-01
Supplement: b603937e.pdf [file b603937e.pdf]

**Supplementary Table 1.** ZORA-DFT  $^1K(X,Cl)_{iso}$  values for the triphenyl group-14 chlorides.<sup>a</sup>

| Compound             | Relativistic Effects | FC     | SD    | PSO    | DSO | (FC+SD)xPSO | Total  |
|----------------------|----------------------|--------|-------|--------|-----|-------------|--------|
| Ph <sub>3</sub> CCl  | Non-relativistic     | -96.5  | 12.7  | 16.0   | 0.3 | N/A         | -67.6  |
|                      | Scalar               | -94.4  | 12.7  | 16.0   | 0.3 | N/A         | -65.4  |
|                      | Scalar + Spin-orbit  | -94.4  | 12.5  | 16.0   | 0.3 | 1.5         | -64.2  |
| Ph <sub>3</sub> SiCl | Non-relativistic     | -170.9 | 8.0   | -25.6  | 0.2 | N/A         | -188.4 |
|                      | Scalar               | -167.5 | 8.0   | -25.8  | 0.2 | N/A         | -185.1 |
|                      | Scalar + Spin-orbit  | -167.5 | 8.0   | -25.8  | 0.2 | 2.1         | -183.1 |
| Ph <sub>3</sub> GeCl | Non-relativistic     | -406.5 | 27.5  | -53.9  | 0.1 | N/A         | -432.8 |
|                      | Scalar               | -391.1 | 28.3  | -54.0  | 0.1 | N/A         | -416.7 |
|                      | Scalar + Spin-orbit  | -391.2 | 28.8  | -54.1  | 0.1 | 9.9         | -406.4 |
| Ph <sub>3</sub> SnCl | Non-relativistic     | -565.0 | 36.9  | -107.3 | 0.1 | N/A         | -635.3 |
|                      | Scalar               | -668.0 | 41.6  | -113.3 | 0.1 | N/A         | -739.5 |
|                      | Scalar + Spin-orbit  | -668.8 | 46.8  | -114.0 | 0.1 | 28.1        | -707.7 |
| Ph <sub>3</sub> PbCl | Non-relativistic     | -735.1 | 75.7  | -151.9 | 0.1 | N/A         | -811.2 |
|                      | Scalar               | -596.1 | 103.2 | -181.8 | 0.1 | N/A         | -674.6 |
|                      | Scalar + Spin-orbit  | -626.3 | 158.8 | -184.6 | 0.1 | 156.5       | -495.5 |

<sup>a</sup>All values are in  $10^{19} \text{ J}^2 \text{ T}^{-1}$ .

**Supplementary Table 2.** ZORA-DFT  $^1K(X,Cl)$  values for the triphenyl group-14 chlorides.<sup>a</sup>

| Compound             | Relativistic Effects | SD+(FCxSD) | PSO   | DSO  | (FC+SD)xPSO | Total |
|----------------------|----------------------|------------|-------|------|-------------|-------|
| Ph <sub>3</sub> CCl  | Non-relativistic     | 57.5       | -28.1 | 6.8  | N/A         | 36.2  |
|                      | Scalar               | 57.6       | -28.1 | 6.8  | N/A         | 36.2  |
|                      | Scalar + Spin-orbit  | 54.8       | -28.1 | 6.8  | -2.1        | 31.4  |
| Ph <sub>3</sub> SiCl | Non-relativistic     | 119.1      | 43.5  | 6.8  | N/A         | 169.4 |
|                      | Scalar               | 117.8      | 43.7  | 6.8  | N/A         | 168.3 |
|                      | Scalar + Spin-orbit  | 114.9      | 43.8  | 6.8  | -3.0        | 162.4 |
| Ph <sub>3</sub> GeCl | Non-relativistic     | 227.1      | 96.0  | 11.3 | N/A         | 334.3 |
|                      | Scalar               | 214.2      | 96.2  | 11.3 | N/A         | 321.7 |
|                      | Scalar + Spin-orbit  | 201.8      | 96.4  | 11.2 | -15.1       | 294.3 |
| Ph <sub>3</sub> SnCl | Non-relativistic     | 366.5      | 203.2 | 14.4 | N/A         | 584.1 |
|                      | Scalar               | 383.8      | 212.3 | 14.4 | N/A         | 610.4 |
|                      | Scalar + Spin-orbit  | 353.5      | 213.3 | 14.4 | -45.5       | 535.7 |
| Ph <sub>3</sub> PbCl | Non-relativistic     | 481.0      | 269.7 | 18.9 | N/A         | 769.7 |
|                      | Scalar               | 103.0      | 312.5 | 19.1 | N/A         | 434.6 |
|                      | Scalar + Spin-orbit  | 32.9       | 316.4 | 17.3 | -298.9      | 67.7  |

<sup>a</sup>All values are in  $10^{19} \text{ J}^2 \text{ T}$ .
